# Supplementary material for: Hierarchically porous 2D carbon from bio-waste: a sustainable, rapid, and efficient oxidase mimic for the colorimetric detection of ascorbic acid
Source: Royal Society of Chemistry journal article supplement (doi:10.1039/d1ma01214b), 2022-01-01
Supplement: d1ma01214b1.pdf [file d1ma01214b1.pdf]

## Supplementary Information

### Hierarchically porous 2D carbon from bio-waste: A sustainable, rapid and efficient oxidase mimic for colorimetric detection of ascorbic acid

Chandra Jeet Verma<sup>1</sup>, Priya Singh<sup>1</sup>, Ravi Prakash Ojha<sup>1</sup> and Rajiv Prakash\*

School of Materials Science and Technology, Indian Institute of Technology (BHU), Varanasi-221005, U.P. India.

\*Corresponding authors email: rprakash.mst@iitbhu.ac.in

<sup>1</sup>All authors have equally contributed to this work.

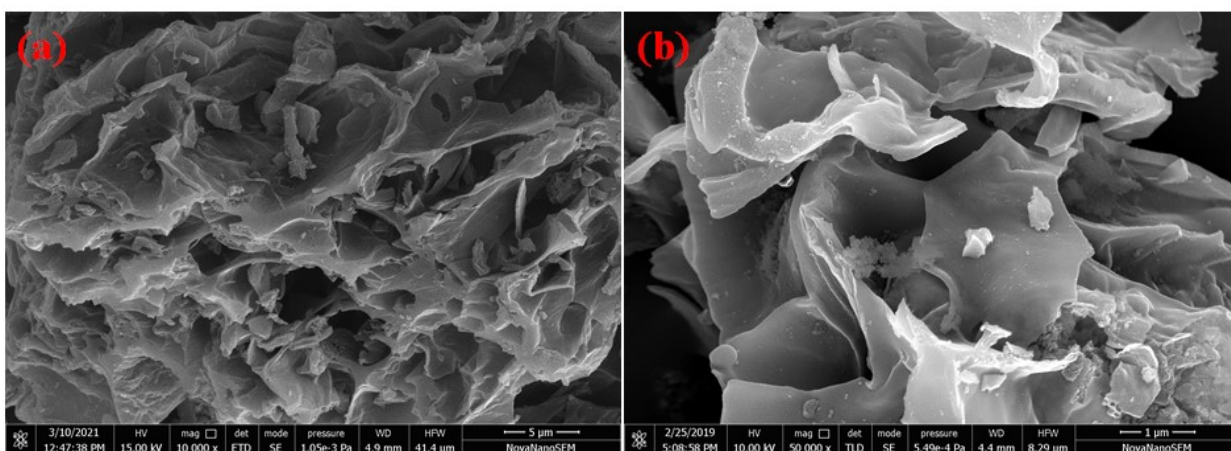

**Fig.S1.** SEM image of 2D carbon (a) at 5 μm scale, (b) at 1 μm Scale

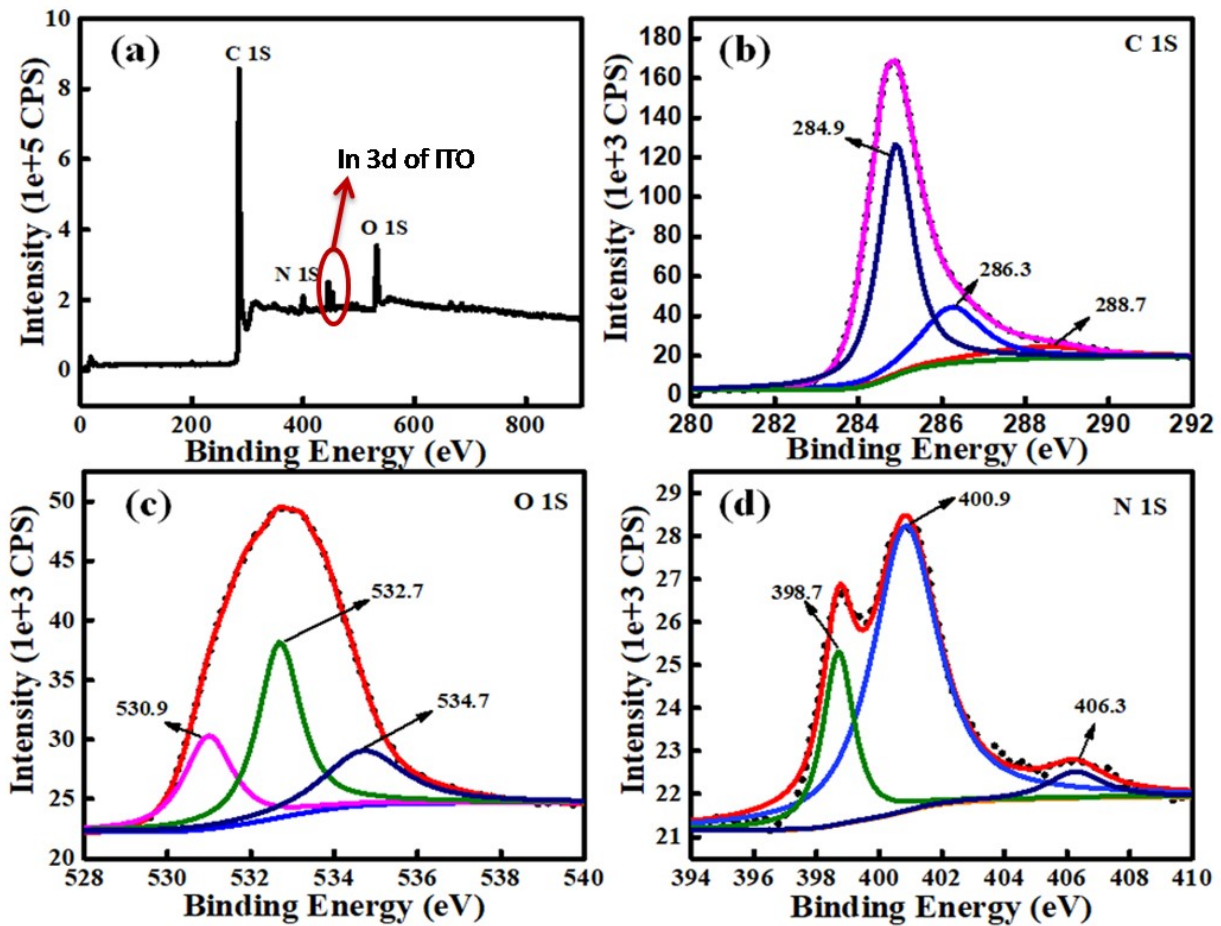

**Fig S2.** XPS study of 2D carbon (a) XPS survey spectrum, (b) Deconvoluted XPS spectra for C, (c) O, (d) N respectively. (Note-Here, ITO was used as substrate for XPS measurement, for which the peak appeared around (~450 eV) due to Indium element (In 3d)).

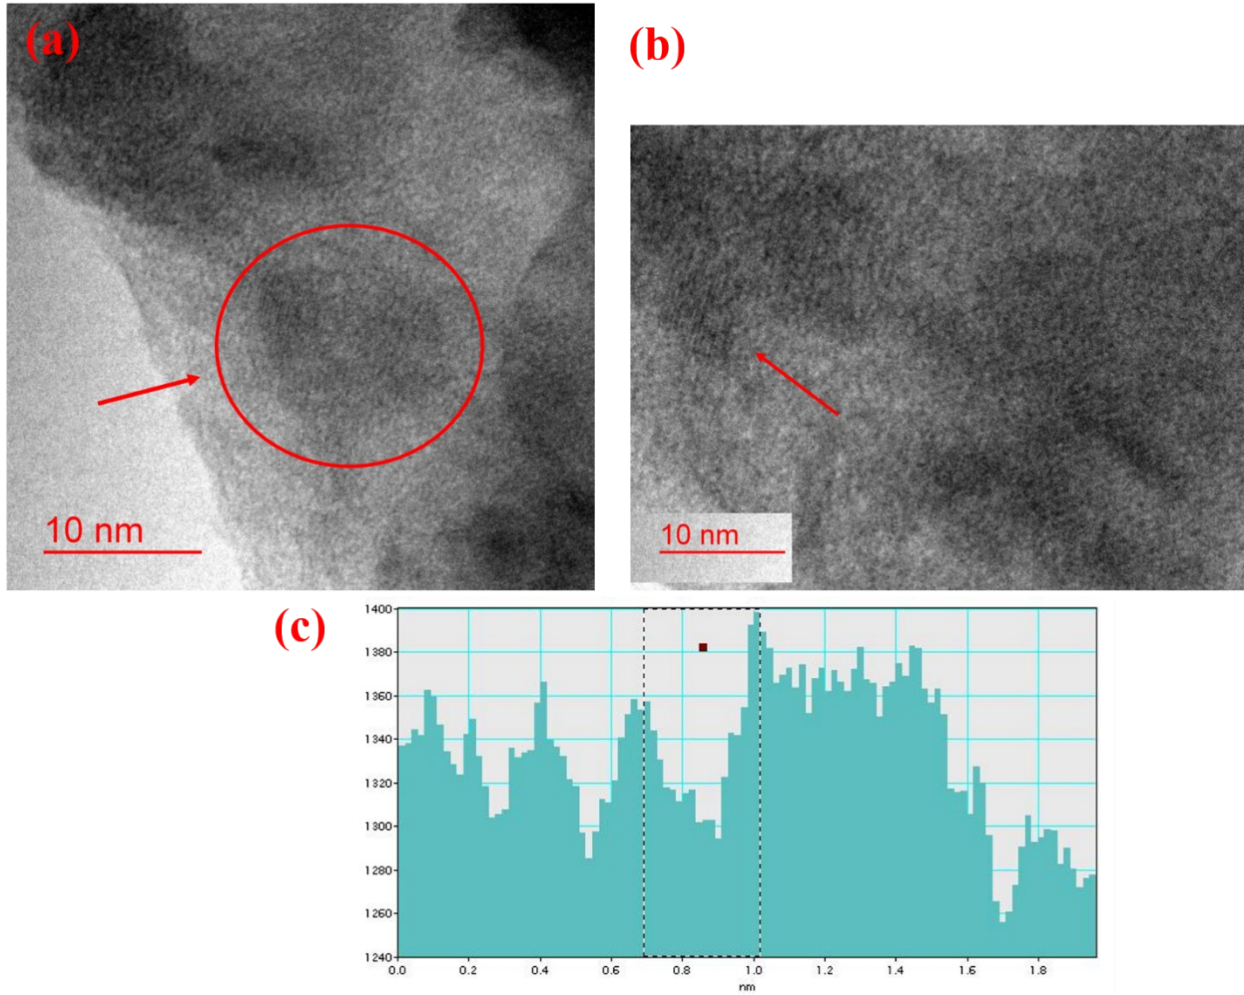

**Fig.S3.** (a) HR TEM image of 2D carbon at 10nm scale, (b) Enlarged image, (c) Interlayer d-Spacing

**Table S1:** Comparison of catalytic property of 2D carbon with other nanozymes.

| S. No. | Catalyst       | Substrate | Km (mM) | Vmax (MS <sup>-1</sup> ) | Reference |
|--------|----------------|-----------|---------|--------------------------|-----------|
| 1      | 2D carbon      | TMB       | 0.122   | 5.3 x 10 <sup>-6</sup>   | This work |
| 2      | C-dots         | TMB       | 0.039   | 3.61 x 10 <sup>-8</sup>  | 1         |
| 3      | HRP            | TMB       | 0.434   | 10 x 10 <sup>-8</sup>    | 2         |
| 4      | N-GQDs         | TMB       | 11.19   | 0.38 x 10 <sup>-8</sup>  | 3         |
| 5      | Graphene-AuNPs | TMB       | 0.38    | 18.30 x 10 <sup>-8</sup> | 4         |

**Table S2.** Comparison table for the 2D carbon with other nanozymes.

| Material used                                     | Method      | LOD              | Linear range          | Reference |
|---------------------------------------------------|-------------|------------------|-----------------------|-----------|
| 2D carbon                                         | Colorimetry | 0.26 $\mu$ M     | 1- 70 $\mu$ M         | This work |
| AuNPs                                             | Colorimetry | 0.3 $\mu$ M      | 1-15 $\mu$ M          | <b>5</b>  |
| Cu/Ag/rGO                                         | Colorimetry | 3.6 $\mu$ M      | 1-30 $\mu$ M          | <b>6</b>  |
| MIL-68/MIL-100                                    | Colorimetry | 6 $\mu$ M        | 30-485 $\mu$ M        | <b>7</b>  |
| CuCo <sub>2</sub> O <sub>4</sub><br>Microspheres  | Colorimetry | 0.57 $\mu$ M     | 1.00–10.00<br>$\mu$ M | <b>8</b>  |
| AgFKZSiW <sub>12</sub> /PPy                       | Colorimetry | 2.7 $\mu$ M      | 1 to 80 $\mu$ M       | <b>9</b>  |
| CuFKZP <sub>2</sub> W <sub>18</sub> /PPy<br>(15%) | Colorimetry | 0.627<br>$\mu$ M | 5–100 $\mu$ M         | <b>10</b> |

## References:

1. W. Shi, Q. Wang, Y. Long, Z. Cheng, S. Chen, H. Zheng and Y. Huang, Carbon nanodots as peroxidase mimetics and their applications to glucose detection. *ChemComm (Camb)*, 2011, **47**, 6695–7.
2. Q. Chen, M. Liu, J. Zhao, X. Peng, X. Chen, N. Mi, B. Yin, H. Li, Y. Zhang and S. Tao, Water-dispersible silicon dots as a peroxidase mimetic for the highly-sensitive colorimetric detection of glucose, *ChemComm.*, 2014, **50**, 6771–6774.
3. L. Lin, X. Song, Y. Chen, M. Rong, T. Zhao, Y. Wang, Y. Jiang and X. Chen, Intrinsic peroxidase-like catalytic activity of nitrogen-doped graphene quantum dots and their application in the colorimetric detection of H<sub>2</sub>O<sub>2</sub> and glucose *Anal. Chim. Acta.*, 2015, **869**, 89-95.
4. X. Chen, X. Tian, B. Su, Z. Huang, X. Chen and M. Oyama, Au nanoparticles on citrate-functionalized graphene nanosheets with a high peroxidase like performance, *Dalton trans.*, 2014, **43**, 7449-7454.
5. L.P. Zhang, B. Hu, and J.H. Wang, Label-free colorimetric sensing of ascorbic acid based on Fenton reaction with unmodified gold nanoparticle probes and multiple molecular logic gates, *Anal. Chim. Acta*, 2012, **717**, 127– 133.
6. G. Darabdhara, B. Sharma, M.R. Das, R. Boukherroub, S. Szunerits, Cu-Ag bimetallic nanoparticles on reduced graphene oxide nanosheets as peroxidase mimic for glucose and ascorbic acid detection, *Sens. Actuators B: chem.*, 2017, **238**, 842–851.

7. J.W. Zhang, H. T. Zhang, Z. Y. Du, X. Wang, S. H. Yu and H.L. Jiang, Water-stable metal–organic frameworks with intrinsic peroxidase-like catalytic activity as a colorimetric biosensing platform, *ChemComm*, 2014, **50**, 1092—1094.
8. S. Han, X. Chen, Y. Fan, Y. Zhang, Z.D. Yang, X. Kong, Z. Liu, Q. Liu and X. Zhang, The excellent peroxidase-like activity of uniform  $\text{CuCo}_2\text{O}_4$  microspheres with oxygen vacancy for fast sensing of hydrogen peroxide and ascorbic acid, *New J. Chem.*, 2021,**45**, 2030-2037.
9. X. Li, L. Sun, X. Yang, K. Zhou, G. Zhang, Z. Tong, C. Wang and J. Sha, Enhancing the colorimetric detection of  $\text{H}_2\text{O}_2$  and ascorbic acid on polypyrrole coated fluconazole functionalized POMOFs” *Analyst*, 2019,**144**, 3347-3356.
10. Q. Li, M. Xu, X. Li, S. Li, L. Hou, Y. Chen and J. Sha, A polypyrrole-coated eightfold-helical Wells–Dawson POM-based Cu-FKZ framework for enhanced colorimetric sensing, *Analyst*, 2020, **145**, 4021–4030.
